# Supplementary material for: High-throughput Production of ZnO-MoS2-Graphene Heterostructures for Highly Efficient Photocatalytic Hydrogen Evolution
Source: PubMed Central journal article supplement (PMC6678946; doi:10.3390/ma12142233), 2019-07-11
Supplement: materials-12-02233-s001.pdf [file materials-12-02233-s001.pdf]

## Supporting Information

# High-throughput Production of ZnO-MoS<sub>2</sub>-Graphene Heterostructures for Highly Efficient Photocatalytic Hydrogen Evolution

Haocong Dong <sup>1,2</sup>, Junzhu Li <sup>2,3</sup>, Mingguang Chen <sup>3</sup>, Hongwei Wang <sup>2,4</sup>, Xiaochuan Jiang <sup>2,5</sup>, Yongguang Xiao <sup>1,\*</sup>, Bo Tian <sup>2,3,\*</sup> and Xixiang Zhang <sup>3,\*</sup>

<sup>1</sup> Key Laboratory of Film Materials & Application for Equipment, School of Materials Science and Engineering, Xiangtan University, Xiangtan 411105, China; [haocong.dong@11dlab.com](mailto:haocong.dong@11dlab.com) (H.D.)

<sup>2</sup> Eleven-Dimensional Nanomaterial Research Institute, Xiamen 361000, China; [junzhu.li@kaust.edu.sa](mailto:junzhu.li@kaust.edu.sa) (J.L.); [hongwei.wang@11dlab.com](mailto:hongwei.wang@11dlab.com) (H.W.); [xiaochuan.jiang@11dlab.com](mailto:xiaochuan.jiang@11dlab.com) (X.J.)

<sup>3</sup> Physical Science and Engineering Division, King Abdullah University of Science and Technology (KAUST), Thuwal 23955-6900, Saudi Arabia; [mingguang.chen@kaust.edu.sa](mailto:mingguang.chen@kaust.edu.sa) (M.C.)

<sup>4</sup> State Key Laboratory of Advanced Optical Communication Systems and Networks, Department of Electronic Engineering Shanghai Jiao Tong University, Shanghai 200240, China

<sup>5</sup> Department of Astronomy, Xiamen University, Xiamen 361000, China

\* Correspondence: [bo.tian@kaust.edu.sa](mailto:bo.tian@kaust.edu.sa) (B.T.); [ygxiao@xtu.edu.cn](mailto:ygxiao@xtu.edu.cn) (Y.X.); [xixiang.zhang@kaust.edu.sa](mailto:xixiang.zhang@kaust.edu.sa) (X.Z.)

We provided a survey XPS in the main text to confirm the existence of each element component. In addition, the HR-XPS results are shown as follows:

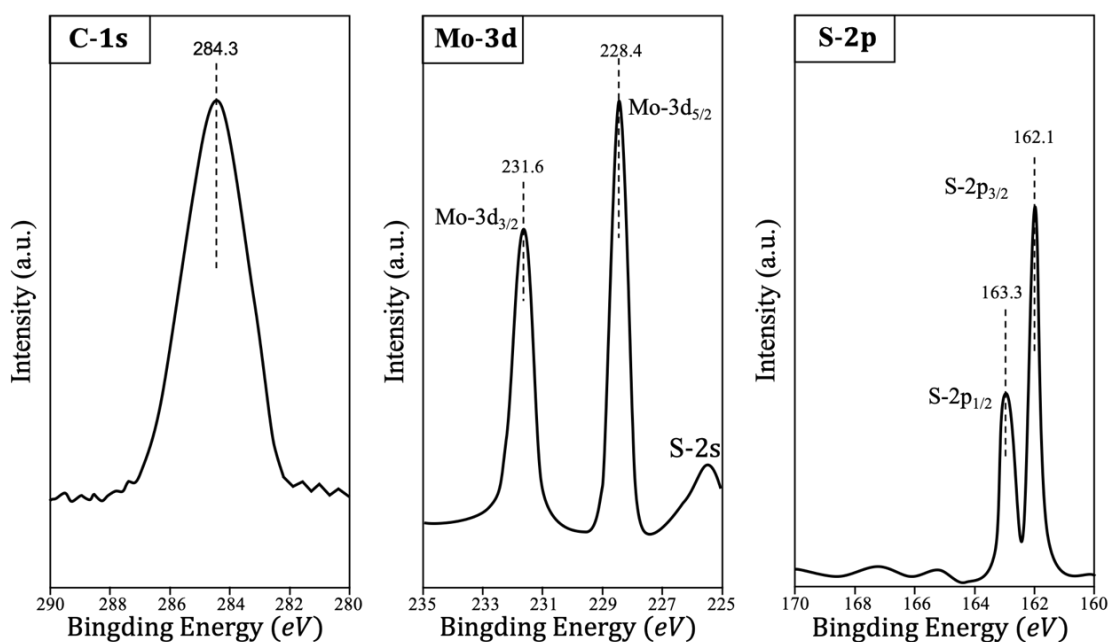

**Figure S1.** HR XPS of C-1s, Mo-3d and S-2p after reducing noisy.
